# Supplementary material for: MPSM-DTI: prediction of drug–target interaction via machine learning based on the chemical structure and protein sequence
Source: Royal Society of Chemistry journal article supplement (doi:10.1039/d1dd00011j), 2022-01-01
Supplement: d1dd00011j1.pdf [file d1dd00011j1.pdf]

**MPSM-DTI: Prediction of Drug-Target Interaction via Machine  
Learning based on Chemical Structure and Protein Sequence**

Yayuan Peng, Jiye Wang, Zengrui Wu\*, Lulu Zheng, Biting Wang, Guixia Liu,

Weihua Li, Yun Tang\*

*Shanghai Frontiers Science Center of Optogenetic Techniques for Cell Metabolism,  
School of Pharmacy, East China University of Science and Technology, 130 Meilong  
Road, Shanghai 200237, China.*

\*Corresponding authors. E-mail: [ytang234@ecust.edu.cn](mailto:ytang234@ecust.edu.cn) (Y.T.);  
[zengruiwu@ecust.edu.cn](mailto:zengruiwu@ecust.edu.cn) (Z.W.).

## Model construction

Five machine learning methods were used to build models for DTI prediction, including decision tree (DT), bagging, gradient boost decision tree (GBDT), k-nearest neighbors (KNN), and support vector machine (SVM).

**DT.** By a set of if-then-else decision rules learned from data features, DT created a tree model to solve very difficult problems <sup>1</sup>. The deeper the tree is, the more complex the DT model is.

**Bagging.** Bagging trains a number of base estimators parallelly each from a different *bootstrap sample* by calling a base learning algorithm <sup>2</sup>. Here the base estimators are DT. After obtaining the base estimators, bagging combines all individual predictions and then forms a final prediction by majority voting.

**GBDT.** GBDT is a kind of boosting ensemble strategy with training DT base estimator successively <sup>3</sup>. The main idea of GBDT is to find DT hypothesis  $h_t(X)$  to make the loss function lowest in every training process.

**KNN.** KNN is to assign the classification of unclassified sample points depending on a number of closest previously classified sample points <sup>4</sup>. The distance can be any metric measure, among which standard Euclidean distance is the most common choice. In scikit-learn, the contribution of neighbor samples can be adjusted according to far or near distance by altering the parameter of *weights*.

**SVM.** SVM is a class of supervised machine learning methods for classification, regression and outliers detection <sup>5</sup>. SVC (support vector classification) is the classification algorithm for two class or multiclass classification. The main idea of SVC is to find a hyperplane which could categorize difficult samples by mapping data into high dimensional space <sup>6</sup>. Kernel tricks was critical when mapping data from low dimensional to high dimensional space. Usually the *rbf* kernel was used.

**Table S1.** The predicted results of 100 active compound target interaction pairs using MPSM-DTI model, SwissTarget, NetInfer and ChemMapper webserver. The “1” means true prediction and “0” means false prediction. The results of SDTNBI (Top 20) and bSDTNBI (Top 20) were not list below for the limited space.

| No. | Target  | Compound ID | MPSM-DTI | SwissTarget | SDTNBI (Top 50) | bSDTNBI (Top 50) | ChemMapper | Ref. |    |
|-----|---------|-------------|----------|-------------|-----------------|------------------|------------|------|----|
| 1   |         | C-01        | 1        | 0           | 1               | 1                | 0          | 7    |    |
| 2   |         | C-02        | 1        | 1           | 0               | 0                | 0          | 8    |    |
| 3   |         | C-03        | 1        | 1           | 0               | 0                | 0          | 8    |    |
| 4   | DHCR7   | C-04        | 1        | 1           | 0               | 0                | 0          | 8    |    |
| 5   |         | C-05        | 1        | 1           | 0               | 0                | 0          | 8    |    |
| 6   |         | C-06        | 1        | 0           | 1               | 1                | 0          | 9    |    |
| 7   |         | C-07        | 1        | 0           | 0               | 0                | 0          | 9    |    |
| 8   |         | C-08        | 1        | 0           | 0               | 0                | 0          | 9    |    |
| 9   |         |             | C-09     | 1           | 1               | 1                | 1          | 1    | 10 |
| 10  |         |             | C-10     | 1           | 1               | 0                | 0          | 0    | 11 |
| 11  |         |             | C-11     | 1           | 1               | 0                | 0          | 0    | 11 |
| 12  |         | C-12        | 1        | 1           | 0               | 0                | 0          | 12   |    |
| 13  |         | C-13        | 1        | 1           | 0               | 0                | 0          | 12   |    |
| 14  |         | C-14        | 1        | 1           | 0               | 0                | 0          | 12   |    |
| 15  | HTR1F   | C-15        | 1        | 1           | 0               | 0                | 0          | 12   |    |
| 16  |         | C-16        | 1        | 1           | 0               | 0                | 0          | 12   |    |
| 17  |         | C-17        | 1        | 1           | 0               | 0                | 0          | 12   |    |
| 18  |         | C-18        | 1        | 1           | 0               | 0                | 0          | 12   |    |
| 19  |         | C-19        | 1        | 1           | 0               | 0                | 0          | 12   |    |
| 20  |         | C-20        | 1        | 1           | 0               | 0                | 1          | 12   |    |
| 21  |         | C-21        | 1        | 1           | 1               | 1                | 1          | 12   |    |
| 22  |         | C-22        | 1        | 1           | 0               | 0                | 0          | 13   |    |
| 23  |         | C-23        | 1        | 1           | 1               | 1                | 0          | 14   |    |
| 24  |         | C-24        | 1        | 1           | 1               | 1                | 1          | 15   |    |
| 25  |         | C-25        | 1        | 1           | 1               | 1                | 1          | 15   |    |
| 26  |         | C-26        | 1        | 1           | 0               | 1                | 1          | 15   |    |
| 27  |         | C-27        | 1        | 0           | 1               | 1                | 1          | 15   |    |
| 28  |         | C-28        | 1        | 0           | 1               | 1                | 1          | 15   |    |
| 29  | LTB4R   | C-29        | 1        | 1           | 1               | 1                | 1          | 15   |    |
| 30  |         | C-30        | 1        | 0           | 0               | 1                | 1          | 15   |    |
| 31  |         | C-31        | 1        | 0           | 1               | 1                | 1          | 15   |    |
| 32  |         | C-32        | 1        | 1           | 1               | 1                | 1          | 15   |    |
| 33  |         | C-33        | 1        | 0           | 1               | 1                | 1          | 15   |    |
| 34  |         | C-34        | 1        | 0           | 1               | 1                | 1          | 15   |    |
| 35  |         | C-35        | 1        | 0           | 1               | 1                | 1          | 15   |    |
| 36  |         | C-36        | 1        | 0           | 1               | 1                | 1          | 15   |    |
| 37  | CYSLTR2 | C-37        | 1        | 1           | 0               | 0                | 0          | 16   |    |
| 38  |         | C-38        | 0        | 1           | 0               | 0                | 1          | 16   |    |

|    |       |      |   |   |   |   |   |       |
|----|-------|------|---|---|---|---|---|-------|
| 39 |       | C-39 | 1 | 1 | 1 | 1 | 0 | 16    |
| 40 |       | C-40 | 1 | 1 | 0 | 1 | 1 | 16    |
| 41 |       | C-41 | 1 | 1 | 1 | 1 | 1 | 16    |
| 42 |       | C-42 | 0 | 1 | 0 | 0 | 1 | 17    |
| 43 |       | C-43 | 0 | 1 | 0 | 0 | 1 | 17    |
| 44 |       | C-44 | 0 | 0 | 0 | 0 | 0 | 17    |
| 45 |       | C-45 | 1 | 0 | 1 | 1 | 0 | 17    |
| 46 |       | C-46 | 1 | 1 | 0 | 0 | 0 | 16    |
| 47 |       | C-47 | 1 | 1 | 0 | 0 | 1 | 16    |
| 48 |       | C-48 | 1 | 1 | 0 | 0 | 1 | 16    |
| 49 |       | C-49 | 1 | 1 | 0 | 0 | 1 | 16    |
| 50 |       | C-50 | 1 | 1 | 0 | 0 | 0 | 16    |
| 51 |       | C-51 | 1 | 1 | 0 | 0 | 0 | 16    |
| 52 |       | C-52 | 1 | 1 | 1 | 1 | 0 | 18    |
| 53 |       | C-53 | 1 | 1 | 1 | 1 | 1 | 19    |
| 54 |       | C-54 | 1 | 1 | 1 | 1 | 1 | 19    |
| 55 | GRIK3 | C-55 | 0 | 1 | 0 | 1 | 0 | 19    |
| 56 |       | C-56 | 0 | 1 | 0 | 1 | 0 | 19    |
| 57 |       | C-57 | 1 | 1 | 0 | 1 | 0 | 19    |
| 58 |       | C-58 | 1 | 0 | 1 | 1 | 0 | 20    |
| 59 |       | C-59 | 1 | 1 | 0 | 0 | 0 | 21    |
| 60 |       | C-60 | 1 | 1 | 1 | 1 | 0 | 22    |
| 61 |       | C-61 | 1 | 1 | 1 | 1 | 0 | 22-24 |
| 62 |       | C-62 | 1 | 0 | 0 | 0 | 0 | 25    |
| 63 |       | C-63 | 1 | 1 | 0 | 0 | 0 | 26    |
| 64 | GPER1 | C-64 | 1 | 1 | 1 | 1 | 0 | 27    |
| 65 |       | C-65 | 1 | 0 | 0 | 0 | 0 | 26    |
| 66 |       | C-66 | 1 | 1 | 0 | 0 | 0 | 26    |
| 67 |       | C-67 | 1 | 0 | 0 | 0 | 0 | 26    |
| 68 |       | C-68 | 1 | 1 | 1 | 1 | 0 | 24    |
| 69 |       | C-69 | 1 | 1 | 1 | 1 | 0 | 23    |
| 70 |       | C-70 | 1 | 0 | 0 | 1 | 1 | 28    |
| 71 |       | C-71 | 1 | 1 | 0 | 1 | 1 | 28    |
| 72 |       | C-72 | 1 | 0 | 0 | 1 | 1 | 28    |
| 73 |       | C-73 | 1 | 0 | 0 | 1 | 1 | 28    |
| 74 |       | C-74 | 1 | 0 | 0 | 1 | 1 | 28    |
| 75 |       | C-75 | 1 | 1 | 1 | 1 | 0 | 28    |
| 76 | PTGIR | C-76 | 1 | 0 | 1 | 1 | 0 | 28    |
| 77 |       | C-77 | 1 | 0 | 1 | 1 | 0 | 28    |
| 78 |       | C-78 | 1 | 0 | 1 | 1 | 0 | 28    |
| 79 |       | C-79 | 1 | 0 | 0 | 1 | 0 | 28    |
| 80 |       | C-80 | 1 | 0 | 1 | 1 | 1 | 28    |
| 81 |       | C-81 | 1 | 0 | 0 | 1 | 0 | 28    |
| 82 |       | C-82 | 1 | 1 | 1 | 1 | 0 | 28    |

|     |       |       |   |   |   |   |   |    |
|-----|-------|-------|---|---|---|---|---|----|
| 83  |       | C-83  | 1 | 0 | 0 | 0 | 1 | 28 |
| 84  |       | C-84  | 1 | 0 | 0 | 1 | 0 | 28 |
| 85  |       | C-85  | 1 | 0 | 0 | 1 | 0 | 28 |
| 86  |       | C-86  | 1 | 1 | 1 | 1 | 0 | 29 |
| 87  |       | C-87  | 1 | 1 | 1 | 1 | 0 | 30 |
| 88  |       | C-88  | 1 | 1 | 0 | 0 | 0 | 31 |
| 89  |       | C-89  | 1 | 0 | 0 | 0 | 0 | 32 |
| 90  |       | C-90  | 1 | 1 | 0 | 0 | 0 | 32 |
| 91  |       | C-91  | 0 | 1 | 1 | 1 | 0 | 33 |
| 92  |       | C-92  | 1 | 1 | 0 | 0 | 1 | 34 |
| 93  | S1PR5 | C-93  | 0 | 1 | 0 | 0 | 1 | 34 |
| 94  |       | C-94  | 1 | 0 | 0 | 0 | 0 | 32 |
| 95  |       | C-95  | 1 | 0 | 0 | 1 | 0 | 32 |
| 96  |       | C-96  | 1 | 0 | 0 | 1 | 0 | 32 |
| 97  |       | C-97  | 0 | 0 | 0 | 1 | 0 | 32 |
| 98  |       | C-98  | 1 | 0 | 0 | 0 | 0 | 32 |
| 99  |       | C-99  | 1 | 0 | 1 | 1 | 0 | 32 |
| 100 |       | C-100 | 1 | 0 | 0 | 1 | 1 | 32 |

**Table S2.** The SMILES and Compound ID of compounds in Table S1.

| SMILES                                                                                                                                                                                          | Compound ID |
|-------------------------------------------------------------------------------------------------------------------------------------------------------------------------------------------------|-------------|
| <chem>CC\C(=C(/c1ccccc1)c1ccc(OCCN(C)C)cc1)c1ccccc1</chem>                                                                                                                                      | C-01        |
| <chem>OC(=O)c1ccc(CCN2CCN(C\C=C\C\c3ccc(Cl)cc3)CC2)cc1</chem>                                                                                                                                   | C-02        |
| <chem>COc1ccc(CCN2CCc3cc(O)c(OC)cc3C2)cc1OC</chem>                                                                                                                                              | C-03        |
| <chem>COc1cccc(CCN2CCc3cc(O)c(OC)cc3C2)c1</chem>                                                                                                                                                | C-04        |
| <chem>COc1cc2CN(CCc3ccc(Cl)cc3)CCc2cc1O</chem>                                                                                                                                                  | C-05        |
| <chem>COc1cccc2C(=O)c3c(O)c4C[C@](O)(C[C@H](O)[C@H]5C[C@H](N)[C@H](O)[C@H](C)O5)c4c(O)c3C(=O)c12)C(=O)CO</chem>                                                                                 | C-06        |
| <chem>COc1cccc2C(=O)c3c(O)c4C[C@](O)(C[C@H](O)[C@H]5C[C@H](NCNC(=O)c6ccccc6O)[C@H](O)[C@H](C)O5)c4c(O)c3C(=O)c12)C(=O)CO</chem>                                                                 | C-07        |
| <chem>CC\C(=C(\c1ccc(O)cc1)c1ccc(OCCN(C)CCOCCOCCO\N=C\c2ccc(O)c(c2)C(=O)NCN[C@H]2C[C@H](O)[C@H]3C[C@@](O)(Cc4c(O)c5C(=O)c6cccc(OC)c6C(=O)c5c(O)c34)C(=O)CO)O[C@H](C)[C@H]2O)cc1)c1ccccc1</chem> | C-08        |
| <chem>CN(C)C1CCc2[nH]c3ccc(NC(=O)c4ccc(F)cc4)cc3c2C1</chem>                                                                                                                                     | C-09        |
| <chem>Cc1ccc2c(OCCN3CCC(Cc4cccc(c4)N4CCCS4(=O)=O)CC3)cccc2n1</chem>                                                                                                                             | C-10        |
| <chem>Cc1ccc2c(OCCN3CCC(Cc4cccc(NS(C)(=O)=O)c4)CC3)cccc2n1</chem>                                                                                                                               | C-11        |
| <chem>CN1CCC(CC1)C(=O)c1ccccc(NC(=O)c2ccc(F)cc2)c1C1</chem>                                                                                                                                     | C-12        |
| <chem>CN1CCC(CC1)C(=O)c1ccc(F)c(NC(=O)c2ccc(F)cc2)c1</chem>                                                                                                                                     | C-13        |
| <chem>CN1CCC(CC1)C(=O)c1cc(F)cc(NC(=O)c2ccc(F)cc2)c1</chem>                                                                                                                                     | C-14        |
| <chem>CN1CCC(CC1)C(=O)c1cc(NC(=O)c2ccc(F)cc2)cccc1F</chem>                                                                                                                                      | C-15        |
| <chem>CN1CCC(CC1)C(=O)c1ccccc(NC(=O)c2ccc(F)cc2)c1F</chem>                                                                                                                                      | C-16        |
| <chem>CN1CCC(CC1)C(=O)c1ccccc(NC(=O)c2ccc(F)cc2)c1</chem>                                                                                                                                       | C-17        |
| <chem>CN1CCC(CC1)C(=O)c1ccccc(NC(=O)c2ccc(F)cc2)c1O</chem>                                                                                                                                      | C-18        |
| <chem>COc1c(NC(=O)c2ccc(F)cc2)cccc1C(=O)C1CCN(C)CC1</chem>                                                                                                                                      | C-19        |
| <chem>CN1CCC(CC1)C(=O)c1ccccc(NC(=O)c2ccc(F)cc2)c1C</chem>                                                                                                                                      | C-20        |
| <chem>CN1CCC(CC1)c1c[nH]c2ccc(NC(=O)c3ccc(F)cc3)cc12</chem>                                                                                                                                     | C-21        |
| <chem>CN1CCC(CC1)C(=O)c1ccccc(NC(=O)c2ccc(F)cc2)n1</chem>                                                                                                                                       | C-22        |
| <chem>CCCCC/C=C\C[C@H](/C=C/C=C\C=C\C[C@H](CCCC(=O)O)O)O</chem>                                                                                                                                 | C-23        |
| <chem>OC(=O)CCCOc1cccc(CCCCCCOc2cc(cc(c2)-c2cncnc2)-c2ccncc2)c1CCC(O)=O</chem>                                                                                                                  | C-24        |
| <chem>OC(=O)CCCOc1cccc(CCCCCCOc2cc(cc(n2)-c2cccc2)-c2cccc2)c1CCC(O)=O</chem>                                                                                                                    | C-25        |
| <chem>OC(=O)CCCOc1cccc(CCCCCCOc2cc(cc(c2)-c2ccc3OCCOc3c2)-c2ccc(F)cc2)c1CCC(O)=O</chem>                                                                                                         | C-26        |
| <chem>OC(=O)CCCOc1cccc(CCCCCCOc2cc(cc(c2)-c2ccc3OCCOc3c2)-c2ccsc2)c1CCC(O)=O</chem>                                                                                                             | C-27        |
| <chem>OC(=O)CCCOc1cccc(CCCCCCOc2cc(cc(c2)-c2cccc(F)c2)-c2ccc3OCCOc3c2)c1CCC(O)=O</chem>                                                                                                         | C-28        |
| <chem>OC(=O)CCCOc1cccc(CCCCCCOc2cc(cc(c2)-c2ccc3OCCOc3c2)-c2ccc3OCCOc3c2)c1CCC(O)=O</chem>                                                                                                      | C-29        |
| <chem>OC(=O)CCCOc1cccc(CCCCCCOc2cc(cc(c2)-c2cccc(F)c2)-c2ccncc2)c1CCC(O)=O</chem>                                                                                                               | C-30        |
| <chem>OC(=O)CCCOc1cccc(CCCCCCOc2cc(cc(c2)-c2cncnc2)-c2ccsc2)c1CCC(O)=O</chem>                                                                                                                   | C-31        |
| <chem>OC(=O)CCCOc1cccc(CCCCCCOc2cc(cc(c2)-c2cccc2)-c2cccc2)c1CCC(O)=O</chem>                                                                                                                    | C-32        |
| <chem>OC(=O)CCCOc1cccc(CCCCCCOc2cc(cc(c2)-c2ccc3OCCOc3c2)-c2cncnc2)c1CCC(O)=O</chem>                                                                                                            | C-33        |

|                                                                             |      |
|-----------------------------------------------------------------------------|------|
| OC(=O)CCCOc1cccc(CCCCCCOe2cc(cc(e2)-c2cenc(Cl)c2)-c2ccsc2)c1CCC(O)=O        | C-34 |
| OC(=O)CCCOc1cccc(CCCCCCOe2cc(cc(e2)-c2ccc3OCOc3c2)-c2enene2)c1CCC(O)=O      | C-35 |
| OC(=O)CCCOc1cccc(CCCCCCOe2cc(cc(e2)-c2ccsc2)-c2ccsc2)c1CCC(O)=O             | C-36 |
| OC(=O)CCCN1cc(CC(O)=O)c2c(\C=C\c3ccc(OCCCCOe4cccc4)cc3)cccc12               | C-37 |
| OC(=O)CCCN1CC(Oe2c(NC(=O)c3ccc(OCCCCe4cccc4)cc3)cccc12)C(O)=O               | C-38 |
| OC(=O)C1CCCC(C1)NC(=O)c1cc(ccc1OCCCCe1ccc(OCCCCOC2CCCC2)cc1)C(O)=O          | C-39 |
| O=C(Nc1cccc2c1oc(cc2=O)-c1nnn[nH]1)c1ccc(OCCCCe2cccc2)cc1                   | C-40 |
| COc1cc(ccc1Cc1cn(C)c2ccc(NC(=O)OC3CCCC3)cc12)C(=O)NS(=O)(=O)c1cccc1C        | C-41 |
| OC(=O)CCCN1C[C@@H](Oe2c(NC(=O)c3ccc(OCCCCe4cccc4)cc3)cccc12)C(O)=O          | C-42 |
| OC(=O)CCCN1C[C@H](Oe2c(NC(=O)c3ccc(OCCCCe4cccc4)cc3)cccc12)C(O)=O           | C-43 |
| CCN(CC)C(=O)\C=C(/C)c1ccc2oc(C(=O)c3ccc(cc3)C#N)c(NC(=O)C(\C#N)=C(\C)O)c2c1 | C-44 |
| CCCCC\C=C/C\C=C/C=C/C=C/[C@@H](Sc1ccc(cc1)C(O)=O)[C@@H](O)CCCC(O)=O         | C-45 |
| OC(=O)CCCc1cn(CC(O)=O)c2c(\C=C\c3ccc(OCCCCOe4cccc4)cc3)cccc12               | C-46 |
| OC(=O)CCCc1cn(CC(O)=O)c2c(\C=C\c3ccc(OCCCCe4cccc4)cc3)cccc12                | C-47 |
| OC(=O)CCCc1cn(CC(O)=O)c2c(\C=C\c3ccc(OCCCCe4cccc(Cl)e4)cc3)cccc12           | C-48 |
| OC(=O)CCCc1cn(CC(O)=O)c2c(\C=C\c3ccc(OCCCCe4c(F)ccc(F)c4F)cc3)cccc12        | C-49 |
| Cc1c(F)cccc1CCCCOe1ccc(\C=C\c2cccc3c(CCCC(O)=O)cn(CC(O)=O)c23)cc1           | C-50 |
| Cc1c(Cl)cccc1CCCCOe1ccc(\C=C\c2cccc3c(CCCC(O)=O)cn(CC(O)=O)c23)cc1          | C-51 |
| N[C@H](C(=O)O)Cn1cc(C)c(=O)n(c1=O)Cc1ccsc1C(=O)O                            | C-52 |
| N[C@H](CCC(O)=O)C(O)=O                                                      | C-53 |
| CC(=C)[C@H]1CN[C@@H]([C@H]1CC(O)=O)C(O)=O                                   | C-54 |
| COc1cccc1\C=C\C[C@H](C[C@H](N)C(O)=O)C(O)=O                                 | C-55 |
| N[C@@H](C[C@@H](C\C=C\c1ccc(Cl)cc1)C(O)=O)C(O)=O                            | C-56 |
| N[C@@H](C[C@@H](C\C=C\c1ccc2cccc2c1)C(O)=O)C(O)=O                           | C-57 |
| N[C@@H](Cn1ccc(=O)n(Cc2cccc2C(O)=O)c1=O)C(O)=O                              | C-58 |
| OC(=O)[C@@H]1CC(F)(F)CN1C[C@H]1CC[C@H]2CN[C@@H](C[C@H]2C1)C(O)=O            | C-59 |
| C[C@]12CC[C@H]3[C@@H](CCc4cc(O)ccc34)[C@@H]1CC[C@@H]2O                      | C-60 |
| CC(=O)c1ccc2N[C@H]([C@H]3CC=C[C@H]3c2c1)c1cc2OCOe2cc1Br                     | C-61 |
| C[C@@H]1Ce2cc(ccc2[C@H](N1CC(C)(C)F)c1c(F)cc(\C=C\C(O)=O)cc1F)C#Cc1enn(C)c1 | C-62 |
| C[C@]12CCC3C(CCc4cc(O)ccc34)C1CC[C@@]2(O)C#Cc1ccc(cc1)[N+](C)(C)C           | C-63 |
| Br1cc2OCOe2cc1[C@@H]1Ne2cccc2[C@@H]2C=CC[C@H]12                             | C-64 |
| C[C@]12CCC3C(CCc4cc(O)ccc34)C1CC[C@@]2(O)C#Cc1ccc(c1)C([O-])=O              | C-65 |
| C[C@]12CCC3C(CCc4cc(O)ccc34)C1CC[C@@]2(O)C#Cc1ccc(C[NH3+])cc1               | C-66 |
| CC(C)(C)OC(=O)NCc1ccc(cc1)C#C[C@]1(O)CCC2C3CCc4cc(O)ccc4C3CC[C@]12C         | C-67 |
| Br1cc2OCOe2cc1[C@@H]1Ne2cccc2[C@@H]2C=CC[C@H]12                             | C-68 |
| C[C@]12CC[C@H]3[C@@H](CCc4cc(O)ccc34)[C@@H]1CC[C@@H]2O                      | C-69 |
| OC(=O)COC[C@H]1CC[C@H](COC(=O)N(c2cccc2)c2ccc(Cl)c(F)c2)CC1                 | C-70 |
| OC(=O)COC[C@H]1CC[C@H](COC(=O)N(c2cccc2)c2ccc(F)c(Cl)c2)CC1                 | C-71 |
| OC(=O)COC[C@H]1CC[C@H](COC(=O)N(c2cccc2)c2ccc(F)c(F)c2)CC1                  | C-72 |
| COc1ccc(cc1)N(C(=O)OC[C@H]1CC[C@H](COCC(O)=O)CC1)c1cccc(F)c1                | C-73 |
| OC(=O)COC[C@H]1CC[C@H](COC(=O)N(c2ccc(F)cc2)c2cccc(F)c2)CC1                 | C-74 |

|                                                                                       |       |
|---------------------------------------------------------------------------------------|-------|
| CC(C)N(CCCCOCC(O)=O)c1enc(-c2ceccc2)c(n1)-c1ceccc1                                    | C-75  |
| OC(=O)COC[C@H]1CC[C@@H](COC(=O)N(c2ceccc2)c2ceccc2)CC1                                | C-76  |
| OC(=O)COC[C@H]1CC[C@H](COC(=O)N(c2ceccc2)c2ceccc2)CC1                                 | C-77  |
| CC(C)N(CCCCOCC(=O)NS(C)=O)c1enc(-c2ceccc2)c(n1)-c1ceccc1                              | C-78  |
| OC(=O)COC[C@H]1CC[C@@H](COC(=O)N(c2ceccc2)c2ccc(Cl)cc2)CC1                            | C-79  |
| OC(=O)COC[C@H]1CC[C@H](COC(=O)N(c2ceccc2)c2ccc(Cl)cc2)CC1                             | C-80  |
| OC(=O)COC[C@H]1CC[C@H](COC(=O)N(c2ceccc2)c2ccc(F)c2)CC1                               | C-81  |
| CC#CCC(C)[C@H](O)C=C[C@H]1[C@H](O)C[C@@H]2C\C(C[C@H]12)=C/CCCC(O)=O                   | C-82  |
| OS(=O)(=O)CCNC(=O)COC[C@H]1CC[C@H](COC(=O)N(c2ceccc2)c2ccc(Cl)cc2)CC1                 | C-83  |
| COc1ccc(cc1)N(C(=O)OC[C@H]1CC[C@H](COCC(O)=O)CC1)c1ceccc1                             | C-84  |
| OC(=O)COC[C@H]1CC[C@@H](COC(=O)N(c2ceccc2)c2ccc(F)c2)CC1                              | C-85  |
| CCCCCCCCc1ccc(c1)C1CC(C1)(N)COP(=O)(O)O                                               | C-86  |
| CCC\N=C1/S\O=C/c2ccc(OC[C@@H](O)CO)c(Cl)c2)C(=O)N1c1ceccc1C                           | C-87  |
| CN(C)CC[C@H](N(C)C(=O)c1c(C)cc(cc1C)-<br>c1ceccc(NS(=O)(=O)c2cc(C)c(Cl)cc2C)c1)C(O)=O | C-88  |
| OC(=O)Cc1ccc(NCc2cc3cc(ccc3s2)-c2ccc3ceccc3c2)c1                                      | C-89  |
| CCc1ceccc1-c1ccc2sc(CNCc3ccc(cc3)C(O)=O)cc12                                          | C-90  |
| CCCCCCCCc1ccc(CCC(N)(CO)COP(O)(O)=O)cc1                                               | C-91  |
| CC(C)Cc1cc(cc(C)n1)-c1nc(no1)-c1cc(C)c(OC[C@@H]2CCC(=O)N2)c(C)n1                      | C-92  |
| CC(C)Cc1cc(nc(C)n1)-c1nc(no1)-c1ccc(OC[C@@H]2CCC(=O)NC2)c(F)c1                        | C-93  |
| CCc1ceccc1-c1ccc2sc(CNc3ccc(CC(O)=O)cc3)cc12                                          | C-94  |
| NC(CNCc1cc2cc(ccc2s1)-c1ccc2ceccc2c1)C(O)=O                                           | C-95  |
| NC(CNCc1cc2cccc(-c3ccc4ceccc4c3)c2s1)C(O)=O                                           | C-96  |
| CC(CNCc1cc2cccc(-c3ccc4ceccc4c3)c2s1)C(O)=O                                           | C-97  |
| CCc1ceccc1-c1ccc2cc(CNc3ccc(CC(O)=O)c3)sc12                                           | C-98  |
| OC(=O)CCNCc1cc2cccc(-c3ccc4ceccc34)c2s1                                               | C-99  |
| CCc1ceccc1-c1ccc2cc(CNCCC(O)=O)sc12                                                   | C-100 |

---



**Table S3.** The optimal hyper-parameters of 30 different models.

| <b>Model</b> | <b>The optimal hyper-parameters</b> |                                        |
|--------------|-------------------------------------|----------------------------------------|
| Des          | Bagging                             | n_estimators: 218                      |
|              | DT                                  | criterion: gini                        |
|              | GBDT                                | learning_rate: 0.5; n_estimators: 1960 |
|              | KNN                                 | n_neighbors: 7, weights: uniform       |
|              | SVM                                 | C: 80                                  |
| FP4          | Bagging                             | n_estimators: 228                      |
|              | DT                                  | criterion: gini                        |
|              | GBDT                                | learning_rate: 0.4, n_estimators: 1925 |
|              | KNN                                 | n_neighbors: 5, weights: uniform       |
|              | SVM                                 | C: 500                                 |
| KR           | Bagging                             | n_estimators: 228                      |
|              | DT                                  | criterion: entropy                     |
|              | GBDT                                | learning_rate: 0.2, n_estimators: 1760 |
|              | KNN                                 | n_neighbors: 3, weights: uniform       |
|              | SVM                                 | C: 180                                 |
| MACCS        | Bagging                             | n_estimators: 235                      |
|              | DT                                  | criterion: gini                        |
|              | GBDT                                | learning_rate: 0.4, n_estimators: 1820 |
|              | KNN                                 | n_neighbors: 5, knn_weights: distance  |
|              | SVM                                 | C: 100                                 |
| Morgan       | Bagging                             | n_estimators: 215                      |
|              | DT                                  | criterion: entropy                     |
|              | GBDT                                | learning_rate: 0.5, n_estimators: 1775 |
|              | KNN                                 | n_neighbors: 5, weights: uniform       |
|              | SVM                                 | C: 80                                  |
| PubChem      | Bagging                             | n_estimators: 246                      |
|              | DT                                  | criterion: gini                        |
|              | GBDT                                | learning_rate: 0.4, n_estimators: 1735 |
|              | KNN                                 | n_neighbors: 5, weights: distance      |
|              | SVM                                 | C: 100                                 |

**Table S4.** Ten-fold cross validation results of different models. All values were in percentage.

|         | <b>Model</b> | <b>F1</b>         | <b>ACC</b>        | <b>NPV</b>        | <b>PPV (P)</b>    | <b>SP</b>         | <b>SE (R)</b>     |
|---------|--------------|-------------------|-------------------|-------------------|-------------------|-------------------|-------------------|
| Des     | Bagging      | 82.95±0.99        | 86.01±0.59        | 86.25±0.58        | 85.65±1.22        | 90.11±0.74        | 80.42±1.21        |
|         | DT           | 77.29±1.10        | 80.68±0.78        | 83.47±0.25        | 76.94±1.71        | 82.91±1.16        | 77.65±0.65        |
|         | <b>GBDT</b>  | <b>84.00±0.77</b> | <b>86.69±0.56</b> | <b>87.49±0.65</b> | <b>85.52±1.27</b> | <b>89.74±0.79</b> | <b>82.54±0.81</b> |
|         | KNN          | 78.10±0.68        | 80.16±0.50        | 86.54±0.61        | 73.32±1.13        | 77.66±0.80        | 83.57±0.60        |
|         | SVM          | 83.75±0.63        | 86.35±0.55        | 87.69±0.92        | 84.47±0.77        | 88.79±0.45        | 83.05±1.01        |
| FP4     | Bagging      | 80.95±0.58        | 84.55±0.31        | 84.46±0.44        | 84.68±0.94        | 89.69±0.58        | 77.55±0.67        |
|         | DT           | 76.23±1.01        | 79.71±0.75        | 82.77±0.50        | 75.65±1.45        | 81.83±0.96        | 76.82±0.65        |
|         | <b>GBDT</b>  | <b>81.99±0.62</b> | <b>85.06±0.40</b> | <b>85.97±0.53</b> | <b>83.72±1.23</b> | <b>88.53±0.75</b> | <b>80.35±0.57</b> |
|         | KNN          | 80.13±0.87        | 82.19±0.61        | 87.82±0.45        | 75.93±1.39        | 80.24±1.05        | 84.85±0.77        |
|         | SVM          | 80.41±0.93        | 83.50±0.63        | 85.41±0.56        | 80.84±1.31        | 86.08±0.75        | 79.98±0.80        |
| KR      | Bagging      | 82.75±0.53        | 85.94±0.33        | 85.84±0.55        | 86.09±0.94        | 90.54±0.63        | 79.67±0.81        |
|         | DT           | 77.43±1.23        | 80.84±0.73        | 83.54±0.53        | 77.19±1.42        | 83.15±0.78        | 77.68±1.30        |
|         | GBDT         | 83.71±0.65        | 86.45±0.41        | 87.28±0.43        | 85.25±1.17        | 89.55±0.75        | 82.24±0.65        |
|         | KNN          | 80.76±0.76        | 82.70±0.54        | 88.51±0.46        | 76.30±0.98        | 80.42±0.90        | 85.78±0.85        |
|         | <b>SVM</b>   | <b>84.96±0.58</b> | <b>87.33±0.34</b> | <b>88.72±0.43</b> | <b>85.40±1.03</b> | <b>89.38±0.68</b> | <b>84.53±0.65</b> |
| MACCS   | Bagging      | 82.88±0.79        | 86.00±0.61        | 86.05±0.57        | 85.92±1.30        | 90.36±0.90        | 80.07±0.75        |
|         | DT           | 76.66±0.94        | 80.03±0.75        | 83.18±0.57        | 75.90±1.70        | 81.92±1.21        | 77.46±0.51        |
|         | GBDT         | 83.15±0.64        | 86.02±0.42        | 86.79±0.50        | 84.88±1.16        | 89.34±0.71        | 81.50±0.61        |
|         | KNN          | 80.93±0.50        | 82.93±0.41        | 88.38±0.44        | 76.83±1.10        | 81.05±0.94        | 85.50±0.44        |
|         | <b>SVM</b>   | <b>83.27±0.74</b> | <b>85.95±0.49</b> | <b>87.39±0.61</b> | <b>83.92±1.11</b> | <b>88.38±0.66</b> | <b>82.64±0.84</b> |
| Morgan  | Bagging      | 83.16±0.83        | 86.17±0.55        | 86.39±0.55        | 85.83±1.09        | 90.23±0.66        | 80.65±0.88        |
|         | DT           | 77.75±0.86        | 81.07±0.60        | 83.82±0.78        | 77.39±1.04        | 83.23±0.73        | 78.13±1.13        |
|         | GBDT         | 83.94±0.64        | 86.56±0.52        | 87.68±0.69        | 84.96±0.90        | 89.22±0.57        | 82.95±0.77        |
|         | KNN          | 80.67±0.75        | 82.48±0.51        | 88.81±0.46        | 75.71±1.24        | 79.65±0.94        | 86.33±0.72        |
|         | <b>SVM</b>   | <b>85.55±0.46</b> | <b>87.86±0.28</b> | <b>89.02±0.51</b> | <b>86.24±0.81</b> | <b>90.05±0.49</b> | <b>84.89±0.62</b> |
| PubChem | Bagging      | 82.97±0.88        | 86.07±0.61        | 86.12±0.52        | 85.99±1.45        | 90.40±0.97        | 80.16±0.90        |
|         | DT           | 77.73±0.87        | 80.99±0.69        | 83.89±0.56        | 77.16±1.44        | 82.97±1.11        | 78.31±0.70        |
|         | GBDT         | 84.05±0.62        | 86.74±0.43        | 87.47±0.55        | 85.69±0.99        | 89.88±0.65        | 82.48±0.74        |
|         | KNN          | 80.87±0.56        | 82.88±0.36        | 88.34±0.42        | 76.75±1.06        | 80.98±0.84        | 85.46±0.59        |
|         | <b>SVM</b>   | <b>84.64±0.62</b> | <b>87.10±0.35</b> | <b>88.36±0.46</b> | <b>85.32±0.73</b> | <b>89.39±0.45</b> | <b>83.97±0.81</b> |

$$ACC = \frac{TP + TN}{TP + TN + FP + FN}; \quad NPV = \frac{TN}{TN + FN}; \quad SP = \frac{TN}{TN + FP};$$

ACC: Accuracy; NPV: Negative Predictive Value; SP: Specificity; PPV: Positive Predictive Value (= Precision); SE: Sensitivity (= Recall).

**Table S5.** Test set validation results of different models. All values were in percentage.

|         | <b>Model</b> | <b>F1</b>    | <b>ACC</b>   | <b>NPV</b>   | <b>PPV(P)</b> | <b>SP</b>    | <b>SE(R)</b> |
|---------|--------------|--------------|--------------|--------------|---------------|--------------|--------------|
| Des     | Bagging      | 82.01        | 85.24        | 85.62        | 84.68         | 89.45        | 79.51        |
|         | DT           | 76.06        | 79.65        | 82.59        | 75.70         | 82.01        | 76.42        |
|         | GBDT         | 83.31        | 85.99        | 87.43        | 83.97         | 88.43        | 82.66        |
|         | KNN          | 78.35        | 80.37        | 86.86        | 73.44         | 77.73        | 83.96        |
|         | <b>SVM</b>   | <b>83.82</b> | <b>86.30</b> | <b>88.16</b> | <b>83.76</b>  | <b>88.07</b> | <b>83.88</b> |
| FP4     | Bagging      | 80.07        | 83.85        | 83.90        | 83.78         | 89.11        | 76.68        |
|         | DT           | 75.75        | 79.39        | 82.36        | 75.41         | 81.80        | 76.11        |
|         | <b>GBDT</b>  | <b>82.08</b> | <b>85.15</b> | <b>86.05</b> | <b>83.83</b>  | <b>88.62</b> | <b>80.41</b> |
|         | KNN          | 80.52        | 82.57        | 88.12        | 76.35         | 80.65        | 85.18        |
|         | SVM          | 80.00        | 83.20        | 85.06        | 80.61         | 85.99        | 79.40        |
| KR      | Bagging      | 82.50        | 85.79        | 85.56        | 86.16         | 90.68        | 79.14        |
|         | DT           | 76.78        | 80.13        | 83.33        | 75.95         | 81.97        | 77.64        |
|         | KNN          | 80.19        | 82.25        | 87.87        | 75.98         | 80.31        | 84.89        |
|         | GBDT         | 83.37        | 86.04        | 87.46        | 84.05         | 88.49        | 82.69        |
|         | <b>SVM</b>   | <b>84.37</b> | <b>86.86</b> | <b>88.25</b> | <b>84.92</b>  | <b>89.09</b> | <b>83.82</b> |
| MACCS   | Bagging      | 82.58        | 85.76        | 85.88        | 85.56         | 90.13        | 79.80        |
|         | DT           | 76.99        | 80.51        | 83.15        | 76.93         | 83.05        | 77.06        |
|         | GBDT         | 82.30        | 85.23        | 86.46        | 83.48         | 88.22        | 81.16        |
|         | KNN          | 80.79        | 82.85        | 88.24        | 76.77         | 81.08        | 85.26        |
|         | <b>SVM</b>   | <b>83.27</b> | <b>85.93</b> | <b>87.46</b> | <b>83.79</b>  | <b>88.26</b> | <b>82.75</b> |
| Morgan  | Bagging      | 81.99        | 85.15        | 85.80        | 84.18         | 88.98        | 79.92        |
|         | DT           | 77.72        | 80.84        | 84.20        | 76.51         | 82.22        | 78.97        |
|         | GBDT         | 83.72        | 86.33        | 87.72        | 84.39         | 88.73        | 83.07        |
|         | KNN          | 80.57        | 82.40        | 88.77        | 75.58         | 79.55        | 86.28        |
|         | <b>SVM</b>   | <b>85.11</b> | <b>87.52</b> | <b>88.67</b> | <b>85.90</b>  | <b>89.85</b> | <b>84.34</b> |
| PubChem | Bagging      | 82.42        | 85.61        | 85.82        | 85.29         | 89.91        | 79.75        |
|         | DT           | 76.24        | 79.73        | 82.82        | 75.63         | 81.84        | 76.86        |
|         | GBDT         | 83.27        | 85.99        | 87.27        | 84.17         | 88.64        | 82.38        |
|         | KNN          | 80.73        | 82.80        | 88.16        | 76.74         | 81.08        | 85.15        |
|         | <b>SVM</b>   | <b>84.77</b> | <b>87.16</b> | <b>88.66</b> | <b>85.09</b>  | <b>89.15</b> | <b>84.46</b> |

## References

1. J. R. Quinlan, *Machine Learning*, 1986, **1**, 81-106.
2. L. Breiman, *Machine Learning*, 1996, **24**, 123-140.
3. J. H. Friedman, *Annals of Statistics*, 2001, **29**, 1189-1232.
4. T. M. Cover and P. E. Hart, *IEEE Transactions on Information Theory*, 1967, **13**, 21-27.
5. W. M. Czarnecki, S. Podlewska and A. J. Bojarski, *J. Cheminf.*, 2015, **7**, 38.
6. C. J. C. Burges, *Data Mining and Knowledge Discovery*, 1998, **2**, 121-167.
7. V. C. Jordan, *Journal of medicinal chemistry*, 2003, **46**, 883-908.
8. A. Horling, C. Müller, R. Barthel, F. Bracher and P. Imming, *Journal of Medicinal Chemistry*, 2012, **55**, 7614-7622.
9. P. J. Burke, B. T. Kalet and T. H. Koch, *Journal of Medicinal Chemistry*, 2004, **47**, 6509-6518.
10. Bret D. Wallace, Adam B. Roberts, Rebecca M. Pollet, James D. Ingle, Kristen A. Biernat, Samuel J. Pellock, Madhu K. Venkatesh, L. Guthrie, Sara K. O'Neal, Sara J. Robinson, M. Dollinger, E. Figueroa, Sarah R. McShane, Rachel D. Cohen, J. Jin, Stephen V. Frye, William C. Zamboni, C. Pepe-Ranney, S. Mani, L. Kelly and Matthew R. Redinbo, *Chemistry & Biology*, 2015, **22**, 1238-1249.
11. S. E. Ward, P. J. Eddershaw, C. M. Scott, L. J. Gordon, P. J. Lovell, S. H. Moore, P. W. Smith, K. R. Starr, K. M. Thewlis and J. M. Watson, *Journal of Medicinal Chemistry*, 2008, **51**, 2887-2890.
12. D. Zhang, M.-J. Blanco, B.-P. Ying, D. Kohlman, S. X. Liang, F. Victor, Q. Chen, J. Krushinski, S. A. Filla, K. J. Hudziak, B. M. Mathes, M. P. Cohen, D. Zacherl, D. L. G. Nelson, D. B. Wainscott, S. E. Nutter, W. H. Gough, J. M. Schaus and Y.-C. Xu, *Bioorg. Med. Chem. Lett.*, 2015, **25**, 4337-4341.
13. S.-K. Choi, D. Green, A. Ho, U. Klein, D. Marquess, R. Taylor and S. D. Turner, *Journal of Medicinal Chemistry*, 2008, **51**, 3609-3616.
14. T. Yokomizo, T. Izumi, K. Chang, Y. Takuwa and T. Shimizu, *Nature*, 1997, **387**, 620-624.
15. R. A. Goodnow, A. Hicks, A. Sidduri, A. Kowalczyk, R. Dominique, Q. Qiao, J. P. Lou, P. Gillespie, N. Fotouhi, J. Tilley, N. Cohen, S. Choudhry, G. Cavallo, S. A. Tannu, J. D. Ventre, D. Lavelle, N. S. Tare, H. Oh, M. Lamb, G. Kurylko, R. Hamid, M. B. Wright, A. Pamidimukkala, T. Egan, U. Gubler, A. F. Hoffman, X. Wei, Y. L. Li, J. O'Neil, R. Marcano, K. Pozzani, T. Molinaro, J. Santiago, L. Singer, M. Hargaden, D. Moore, A. R. Catala, L. C. F. Chao, G. Hermann, R. Venkat, H. Mancebo and L. M. Renzetti, *Journal of Medicinal Chemistry*, 2010, **53**, 3502-3516.
16. S. Itadani, K. Yashiro, Y. Aratani, T. Sekiguchi, A. Kinoshita, H. Moriguchi, N. Ohta, S. Takahashi, A. Ishida, Y. Tajima, K. Hisaichi, M. Ima, J. Ueda, H. Egashira, T. Sekioka, M. Kadode, Y. Yonetomi, T. Nakao, A. Inoue, H. Nomura, T. Kitamine, M. Fujita, T. Nabe, Y. Yamaura, N. Matsumura, A. Imagawa, Y. Nakayama, J. Takeuchi and K. Ohmoto, *Journal of Medicinal Chemistry*, 2015, **58**, 6093-6113.
17. S. Itadani, S. Takahashi, M. Ima, T. Sekiguchi, M. Fujita, Y. Nakayama and J. Takeuchi, *ACS Medicinal Chemistry Letters*, 2014, **5**, 1230-1234.
18. P. T. Atlason, C. L. Scholefield, R. J. Eaves, M. B. Mayo-Martin, D. E. Jane and E. Molnár, *Mol Pharmacol*, 2010, **78**, 1036-1045.
19. C. Pedregal, I. Collado, A. Escribano, J. Ezquerro, C. Domínguez, A. I. Mateo, A. Rubio, S. R. Baker, J. Goldsworthy, R. K. Kamboj, B. A. Ballyk, K. Hoo and D. Bleakman, *Journal of Medicinal Chemistry*, 2000, **43**, 1958-1968.
20. E. Szymańska, P. Chałupnik, K. Szczepańska, A. M. Cuñado Moral, D. S. Pickering, B. Nielsen, T.

- N. Johansen and K. Kieć-Kononowicz, *Bioorg. Med. Chem. Lett.*, 2016, **26**, 5568-5572.
21. N. Krosggaard-Larsen, C. G. Delgar, K. Koch, P. M. G. E. Brown, C. Møller, L. Han, T. H. V. Huynh, S. W. Hansen, B. Nielsen, D. Bowie, D. S. Pickering, J. S. Kastrop, K. Frydenvang and L. Bunch, *Journal of Medicinal Chemistry*, 2017, **60**, 441-457.
  22. C. G. Bologa, C. M. Revankar, S. M. Young, B. S. Edwards, J. B. Arterburn, A. S. Kiselyov, M. A. Parker, S. E. Tkachenko, N. P. Savchuck, L. A. Sklar, T. I. Oprea and E. R. Prossnitz, *Nat. Chem. Biol.*, 2006, **2**, 207-212.
  23. D. M. Huryn, L. O. Resnick and P. Wipf, *Journal of Medicinal Chemistry*, 2013, **56**, 7161-7176.
  24. C. Ramesh, T. K. Nayak, R. Burai, M. K. Dennis, H. J. Hathaway, L. A. Sklar, E. R. Prossnitz and J. B. Arterburn, *Journal of Medicinal Chemistry*, 2010, **53**, 1004-1014.
  25. G. Scapin, S. B. Patel, C. Chung, J. P. Varnerin, S. D. Edmondson, A. Mastracchio, E. R. Parmee, S. B. Singh, J. W. Becker, L. H. T. Van der Ploeg and M. R. Tota, *Biochemistry*, 2004, **43**, 6091-6100.
  26. C. M. Revankar, H. D. Mitchell, A. S. Field, R. Burai, C. Corona, C. Ramesh, L. A. Sklar, J. B. Arterburn and E. R. Prossnitz, *ACS Chem. Biol.*, 2007, **2**, 536-544.
  27. M. K. Dennis, R. Burai, C. Ramesh, W. K. Petrie, S. N. Alcon, T. K. Nayak, C. G. Bologa, A. Leitao, E. Brailoiu, E. Deliu, N. J. Dun, L. A. Sklar, H. J. Hathaway, J. B. Arterburn, T. I. Oprea and E. R. Prossnitz, *Nat. Chem. Biol.*, 2009, **5**, 421-427.
  28. T.-A. Tran, B. Kramer, Y.-J. Shin, P. Vallar, P. D. Boatman, N. Zou, C. R. Sage, T. Gharbaoui, A. Krishnan, B. Pal, S. R. Shakya, A. Garrido Montalban, J. W. Adams, J. Ramirez, D. P. Behan, A. Shifrina, A. Blackburn, T. Leakakos, Y. Shi, M. Morgan, A. Sadeque, W. Chen, D. J. Unett, I. Gaidarov, X. Chen, S. Chang, H.-H. Shu, S.-F. Tung and G. Semple, *Journal of Medicinal Chemistry*, 2017, **60**, 913-927.
  29. P. C. Kennedy, R. Zhu, T. Huang, J. L. Tomsig, T. P. Mathews, M. David, O. Peyruchaud, T. L. Macdonald and K. R. Lynch, *J Pharmacol Exp Ther*, 2011, **338**, 879-889.
  30. M. H. Bolli, S. Abele, C. Binkert, R. Bravo, S. Buchmann, D. Bur, J. Gatfield, P. Hess, C. Kohl, C. Mangold, B. Mathys, K. Menyhart, C. Müller, O. Nayler, M. Scherz, G. Schmidt, V. Sippel, B. Steiner, D. Strasser, A. Treiber and T. Weller, *Journal of Medicinal Chemistry*, 2010, **53**, 4198-4211.
  31. D. Angst, P. Janser, J. Quancard, P. Buehlmayer, F. Berst, L. Oberer, C. Beerli, M. Streiff, C. Pally, R. Hersperger, C. Bruns, F. Bassilana and B. Bollbuck, *Journal of Medicinal Chemistry*, 2012, **55**, 9722-9734.
  32. W. Hur, H. Rosen and N. S. Gray, *Bioorg. Med. Chem. Lett.*, 2017, **27**, 1-5.
  33. R. Albert, K. Hinterding, V. Brinkmann, D. Guerini, C. Müller-Hartweg, H. Knecht, C. Simeon, M. Streiff, T. Wagner, K. Welzenbach, F. Zécri, M. Zollinger, N. Cooke and E. Francotte, *Journal of Medicinal Chemistry*, 2005, **48**, 5373-5377.
  34. J. C. Horan, D. Kuzmich, P. Liu, D. DiSalvo, J. Lord, C. Mao, T. D. Hopkins, H. Yu, C. Harcken, R. Betageri, M. Hill-Drzewi, L. Patenaude, M. Patel, K. Fletcher, D. Terenzio, B. Linehan, H. Xia, M. Patel, D. Studwell, C. Miller, E. Hickey, J. I. Levin, D. Smith, R. A. Kemper, L. K. Modis, L. C. Bannen, D. S. Chan, M. B. Mac, S. Ng, Y. Wang, W. Xu and R. M. Lemieux, *Bioorg. Med. Chem. Lett.*, 2016, **26**, 466-471.
